# Supplementary material
Source: PubMed Central journal article supplement (PMC2773959)
Supplement: 0907950106_0907950106SI.pdf [file 0907950106_0907950106SI.pdf]

# Supporting Information

Schreier et al. 10.1073/pnas.0907950106

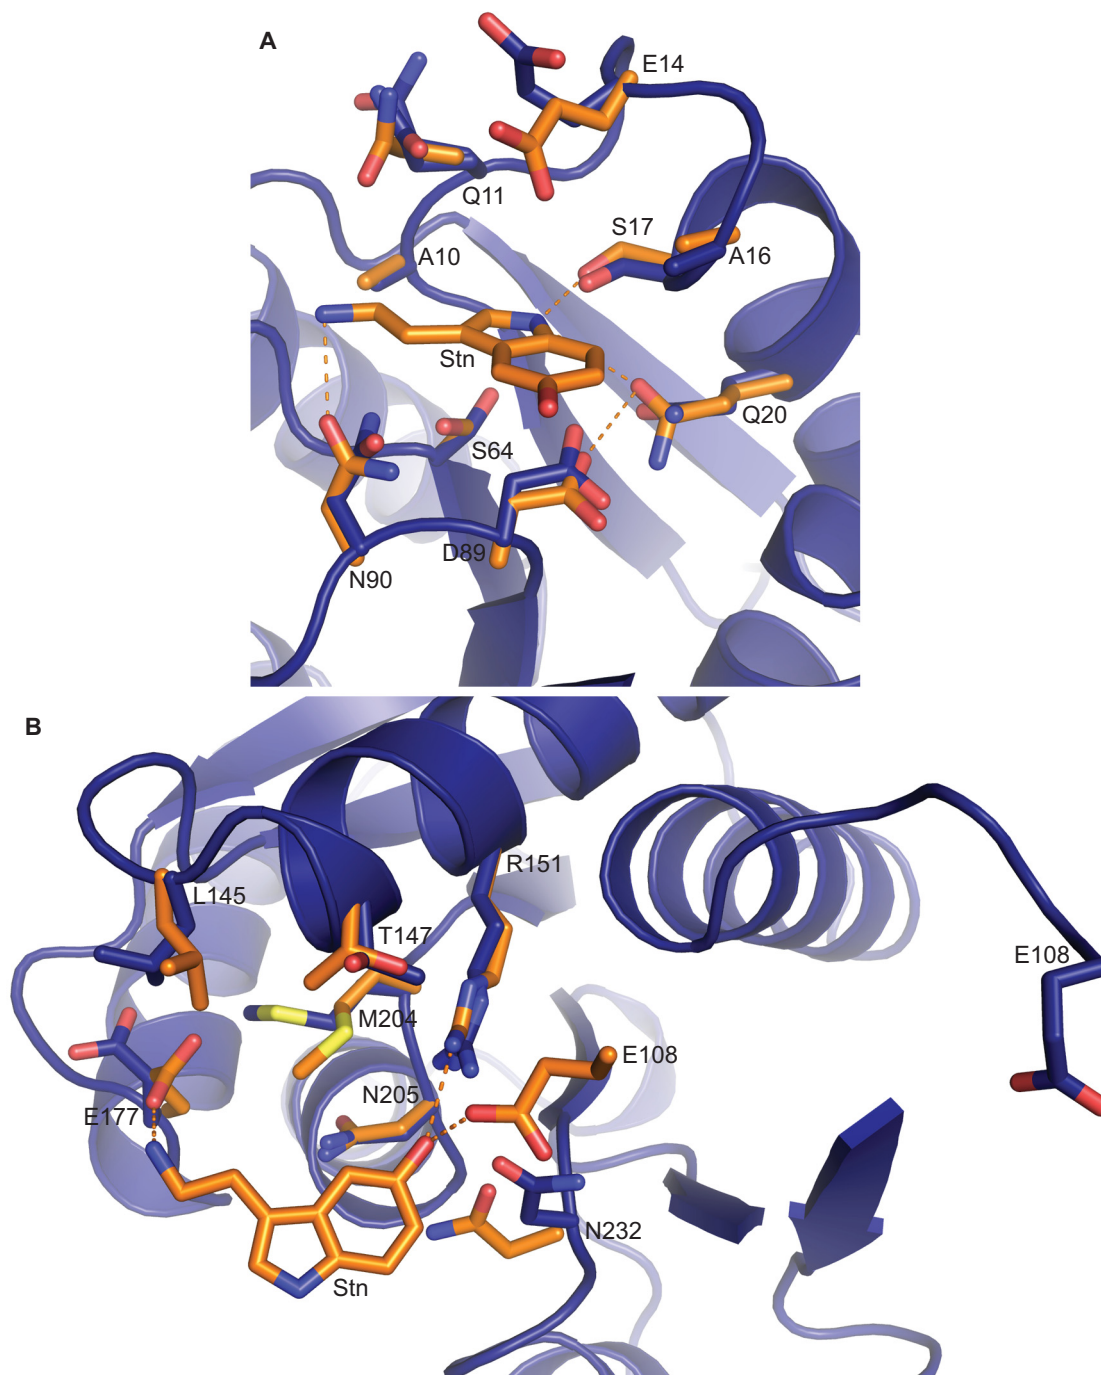

**Fig. S1.** Comparison of the binding pocket residues in the Stn.A2 design prediction (orange) with the ones in the crystal structure (molecule B, dark blue). (A) Superimposition of the binding pocket residues in the N-terminal domain (rmsd of 1.17 over all atoms). (B) Superimposition of the binding pocket residues (excluding E108) in the C-terminal domain (rmsd of 1.06 over all atoms).

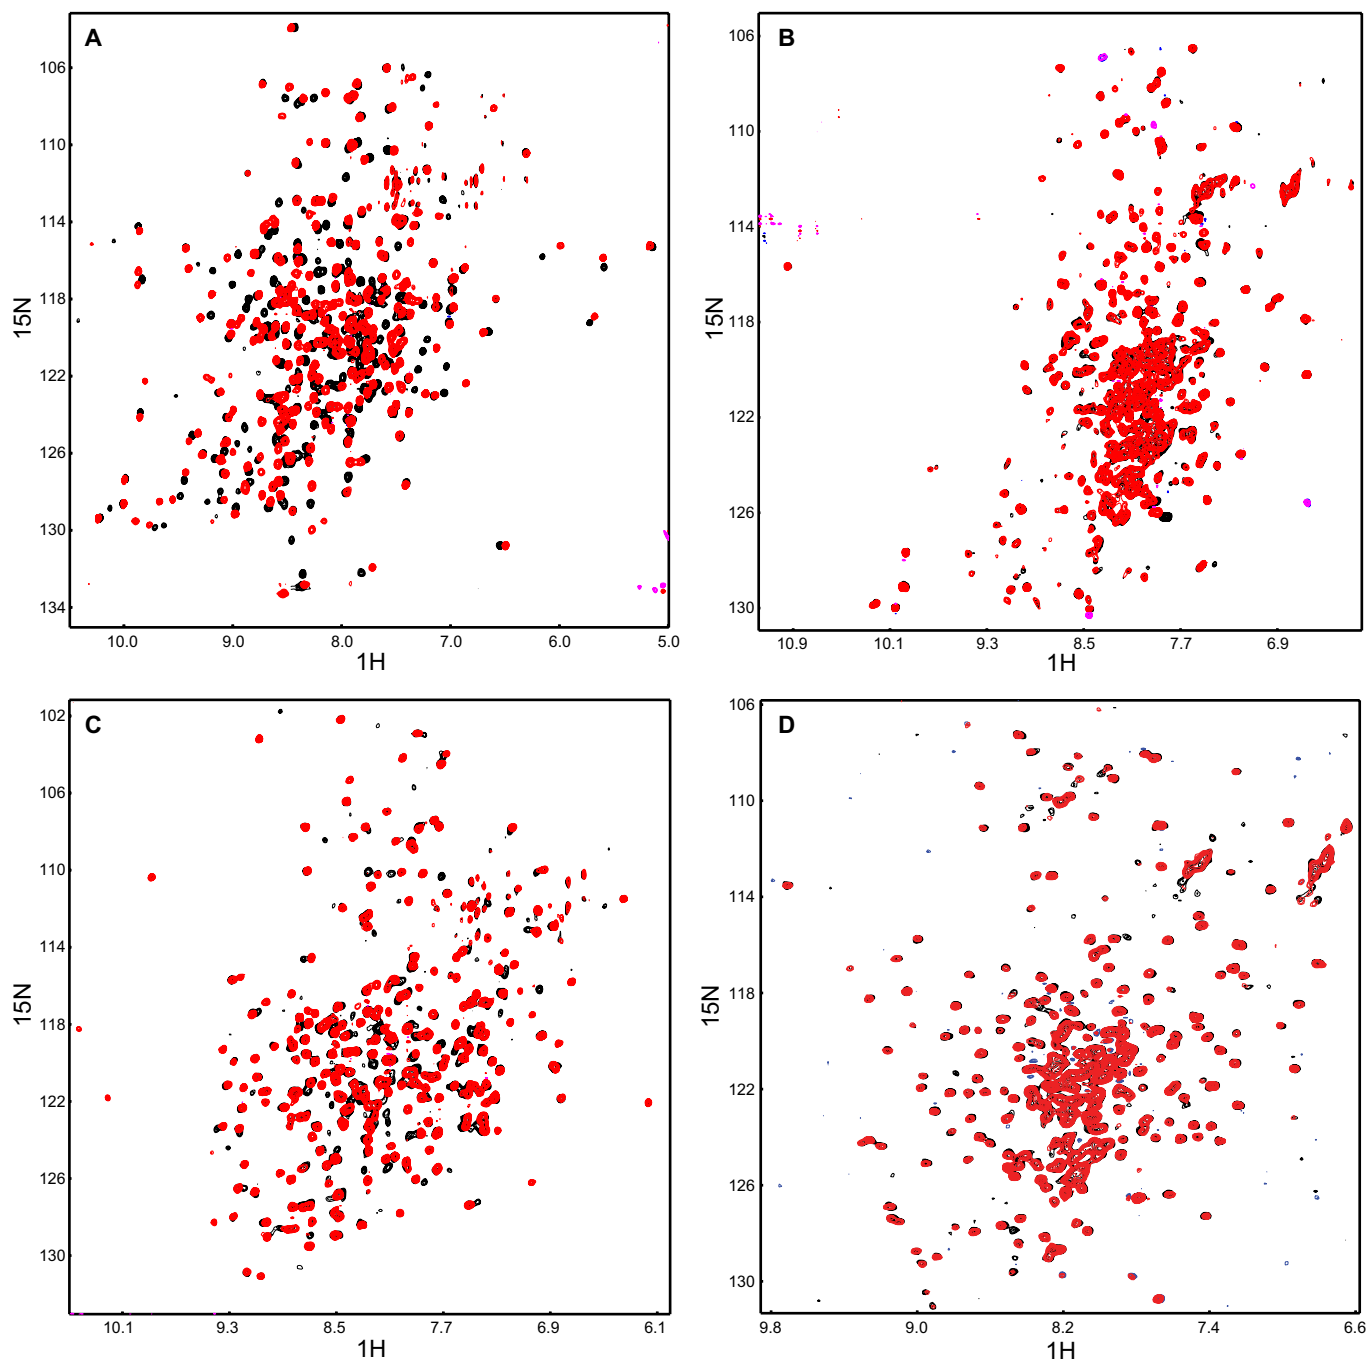

**Fig. S2.** End-point chemical shift titrations of wild-type PBPs and PBP-based receptors using 2D NMR spectroscopy. (A) GBP without ligand (black) and 20-fold excess of glucose (red). Large changes in the spectra occur because of ligand binding and ligand-induced conformational changes. (B) PMPA.G12 without ligand (black) and 20-fold excess of PMPA (red). Because of aggregation or partial folding, the spectra show unresolved areas. No significant chemical shift changes upon addition of ligand could be detected. (C) RBP without ligand (black) and 20-fold excess of glucose (red). Without ligand, RBP exists in equilibrium between open and closed states. Addition of ligand shifts the spectrum to the bound and closed state. (D) TNT.R1 without ligand (black) and twofold excess of TNT (red). The solvent acetonitrile destabilizes the protein, thus to analyze the effect of TNT on its own, acetonitrile was added in equal amounts to both measurements. Because of aggregation at high protein concentrations or partial folding, the spectra show unresolved areas. No significant changes upon ligand binding could be detected. Aliased resonances are shown in blue and magenta for protein without and with ligand, respectively.

**Table S1. Overview of conditions used for NMR measurements**

| Protein          | Temperature<br>[°C] | Protein<br>concentration<br>[mM] | Ligand<br>concentration<br>[mM] | Ligand excess |
|------------------|---------------------|----------------------------------|---------------------------------|---------------|
| ABP (C64A L253C) | 30                  | 0.44                             | 8.6                             | 20×           |
| Stn.A2           | 30                  | 0.54                             | 5.4                             | 10×           |
| Lac.A1           | 20                  | 0.25                             | 24.7                            | 100×          |
| GBP (S112C)      | 30                  | 0.87                             | 17.5                            | 20×           |
| PMPA.G12         | 30                  | 0.13                             | 2.5                             | 20×           |
| RBP (A234C)      | 30                  | 0.41                             | 8.3                             | 20×           |
| TNT.R1           | 30                  | 0.17                             | 0.34                            | 2×            |

**Table S2. Data and refinement statistics for the Stn.A2 dataset**

| Method detail                      | Results                                                                                  |
|------------------------------------|------------------------------------------------------------------------------------------|
| <b>Experimental procedures</b>     |                                                                                          |
| Crystallization condition          | 20% PEG 3350, 0.2M (NH <sub>4</sub> )citrate, 2 μmol/ml serotonin                        |
| Protein solution                   | 0.46 μmol/ml ABPsero (15.7 mg/ml) in 30 mM Tris pH 8.0                                   |
| Cryo protection                    | + 10% PEG 400                                                                            |
| <b>Data collection</b>             |                                                                                          |
| Detector distance (nm)             | 180                                                                                      |
| Wavelength (Å)                     | 0.978                                                                                    |
| Spacegroup                         | P2 <sub>1</sub> 2 <sub>1</sub> 2 <sub>1</sub>                                            |
| Cell dimensions                    | a = 79.9Å, b = 86.3Å, c = 116.9Å, α = β = γ = 90.0°                                      |
| Data range (Å)                     | 40.0–2.20 (2.33–2.20)                                                                    |
| Unique reflections                 | 41,597 (6,539)                                                                           |
| Redundancy                         | 7.28 (7.14)                                                                              |
| Completeness (%)                   | 99.7 (98.7)                                                                              |
| Rmerge (%)*                        | 17.1 (89.1)                                                                              |
| I/σ                                | 13.30 (2.33)                                                                             |
| <b>Refinement statistics</b>       |                                                                                          |
| Rfact (%)                          | 21.0                                                                                     |
| Rfree (%)                          | 27.2                                                                                     |
| rmsd of bond lengths (Å)           | 0.012                                                                                    |
| rmsd of bond angles (Å)            | 1.25                                                                                     |
| No. of water molecules             | 429                                                                                      |
| No. of monomers/asymmetric unit    | 2                                                                                        |
| <b>Structure and model quality</b> |                                                                                          |
| Missing amino acids                | Molecule A: C-terminus (300–308) + His-tag<br>Molecule B: C-terminus (296–308) + His-tag |
| Residues in most favored region    | 594 (97.9%)                                                                              |
| Residues in allowed region         | 606 (99.8%)                                                                              |
| Residues in outlier region         | 1 (0.17%)                                                                                |

\*Rmerge is relatively high, particularly in the highest resolution shell. Still, this shell was included because I/σ, completeness, and redundancy are reasonable.
